# 1 Monoallelic methylation and allele specific expression in a social 2 insect

3 Kate D. Lee<sup>1†</sup>, Zoë N. Lonsdale<sup>2†\*</sup>, Maria Kyriakidou<sup>2</sup>, Harindra E. Amarasinghe<sup>2</sup>, Despina  
4 Nathanael<sup>2</sup>, Eamonn B. Mallon<sup>2</sup>

5 **1 Bioinformatics and Biostatistics Support Hub (B/BASH), University of  
6 Leicester, Leicester, U.K.**

7 **2 Department of Genetics, University of Leicester, Leicester, U.K.**

8 † **Joint first authors**

9 \* **E-mail: Corresponding [zl107@leicester.ac.uk](mailto:zl107@leicester.ac.uk)**

## Abstract

10 Social insects are emerging models for epigenetics. Here we examine a link between monoallelic  
11 methylation and monoallelic expression in the bumblebee *Bombus terrestris* using whole methy-  
12 lome and transcriptome analysis. In mammals and flowering plants, genomic imprinting (parent  
13 of origin allele specific expression) often involves monoallelic expression and methylation. We  
14 found nineteen genes displaying monoallelic methylation and expression. They were enriched  
15 for functions to do with social organisation in the social insects. Evolutionary theory predicts  
16 that social organisation in the hymenoptera involves genomic imprinting.

## Introduction

17 Social hymenoptera (ants, bees and wasps) as important emerging models for epigenetics [Glas-  
18 tad et al., 2011, Weiner and Toth, 2012, Welch and Lister, 2014, Yan et al., 2014]. This is  
19 based on theoretical predictions for a role for genomic imprinting in their social organisation  
20 (e.g. worker reproduction) [Queller, 2003] and on data showing a fundamental role for methy-  
21 lation in their biology [Chittka et al., 2012]. Genomic imprinting is allele specific expression  
22 in diploid individuals, where expression is dependent on the sex of the parent from which an

23 allele was inherited [Haig, 2000]. In mammals and flowering plants, genomic imprinting is often  
24 associated with methylation marks passed from parents to offspring [Reik and Walter, 2001].  
25 There is contradictory evidence for the role of methylation on allele specific expression in social  
26 insects. Methylation is associated with allele specific expression in a number of loci in the ants  
27 *Camponotus floridanus* and *Harpegnathos saltator* [Bonasio et al., 2012]. Other work on the hon-  
28 eybee *Apis mellifera* found no link between potentially imprinted loci and known methylation  
29 sites in that species [Kocher et al., 2015].

30 Given the diversity within the Hymenoptera, especially in social structure, this research area  
31 would benefit from an increase in the breadth of the species studied. The recently sequenced  
32 genome of the bumblebee, *Bombus terrestris* displays a full complement of genes involved in the  
33 methylation system [Sadd et al., 2015]. Our lab has demonstrated that methylation is important  
34 in worker reproduction in this bumblebee [Amarasinghe et al., 2014]. We also recently found  
35 allele specific expression in *Bombus terrestris* worker reproduction genes using a candidate gene  
36 qPCR based approach [Amarasinghe et al., 2015].

37 In this paper, we examined the link between monoallelic methylation and monoallelic expres-  
38 sion in the bumblebee, *Bombus terrestris*, by examining two whole methylome libraries and an  
39 RNA-seq library from the same bee. MeDIP-seq is an immunoprecipitation technique that cre-  
40 ates libraries enriched for methylated cytosines [Harris et al., 2010]. Methyl-sensitive restriction  
41 enzymes can create libraries that are enriched for non-methylated cytosines (MRE-seq) [Harris  
42 et al., 2010]. Genes found in both libraries are monoallelically methylated, with the methylated  
43 allele being in the MeDIP-seq data and the unmethylated allele in the MRE-seq data [Harris  
44 et al., 2010]. Monoallelic expression was identified in these loci from the RNA-seq library. If  
45 only one allele was expressed then we knew that these loci were both monoallelically methylated  
46 and monoallelically expressed in this bee. We confirmed this monoallelic expression in one locus  
47 using qPCR. We also searched more generally for allele specific expression by analysing thirty  
48 published RNA-seq libraries from worker bumblebees [Harrison et al., 2015, Riddell et al., 2014].

## Results and discussion

49 In total, we found nineteen genes that were both monoallelically methylated (present in both  
50 Me-DIP and MRE-seq libraries) and monoallelically expressed (only one allele present in the  
51 RNA-seq library), see supplementary table 1. Monoallelic expression was confirmed in one of  
52 these nineteen (*slit homolog 2 protein-like* (AELG01000623.1)) by allele specific qPCR [Amaras-  
53 inghe et al., 2015]. The allele with a guanine at the snp position had a mean expression of 6.04  
54  $\pm 8.28$  (S.D.) in four bees from three different colonies. The thymine allele was not expressed at  
55 all in these bees. This was not due to the efficiency of the primers as the DNA controls of both  
56 alleles showed amplification (G mean = 422.70  $\pm 507.36$ , T mean = 1575.17  $\pm 503.02$ ).

57 Of the nineteen genes, fourteen had the methylated (MeDIP) allele expressed, while five  
58 had the unmethylated (MRE-seq) allele expressed (see supplementary table 1). These were  
59 blasted against the nr/nt database (blastn). Four returned no hits and a further four returned  
60 noninformative hits.

61 A number of these genes had homologs known to be methylated in other animals. We  
62 found the MeDIP allele of *yippee-like 1* (AELG01001021.1) was expressed. Yippee is an intra-  
63 cellular protein with a zinc-finger like domain. DNA methylation of a CpG island near the  
64 *yippie-like 3* promoter in humans represents a possible epigenetic mechanism leading to de-  
65 creased gene expression in tumours [Kelley et al., 2010]. The MeDIP allele of *slit homolog 2*  
66 *protein-like* (AELG01000623.1) was expressed. Slit is produced by midline glia in insects and  
67 is involved in cell projection during development [Rothberg et al., 1990]. All three human Slits  
68 were found to be hypermethylated in hepatocellular carcinoma cell lines [Zheng et al., 2009].  
69 The MeDIP allele of *methionine aminopeptidase 1-like* (AELG01000544.1) was expressed. Me-  
70 thionine aminopeptidases catalyse N-terminal methionine removal [Leszczyniecka et al., 2006].  
71 MAP1D in humans was found to be potentially oncogenic [Leszczyniecka et al., 2006]. The  
72 MRE-seq allele of *calmodulin-lysine N-methyltransferase-like* (AELG01003672.1) was expressed  
73 in our study. Calmodulin-lysine N-methyltransferase catalyses the trimethylation of a lysine  
74 residue of calmodulin. Calmodulin is a ubiquitous, calcium-dependent, eukaryotic signalling

75 protein with a large number of interactors. The methylation state of calmodulin causes pheno-  
76 typic changes in growth and developmental processes [Magnani et al., 2010].

77 Six of the eleven genes with informative hits have functions to do with social organisation in  
78 the social insects. We found the MRE-seq allele of *Ecdysone receptor* (AELG01000543.1) was  
79 expressed. In *Drosophila melanogaster*, ecdysone receptor interacts with ecdysone to activate a  
80 series of ecdysteroid genes [Takeuchi et al., 2007]. In honeybees, *Ecdysone receptor* is expressed  
81 in the brain mushroom bodies of both workers and queens and ovaries of queens [Takeuchi  
82 et al., 2007]. The MeDIP allele of *Shaker* (AELG01001021.1) was expressed. It is involved in  
83 the operation of potassium ion channel. *Shaker* expression was upregulated in sterile versus  
84 reproductive honeybee workers [Cardoen et al., 2011]. The MRE-seq allele of *excitatory amino*  
85 *acid transporter 4-like* (AELG01000969.1) was expressed. Excitatory amino acid transporters  
86 are neurotransmitter transporters. *Excitatory amino acid transporter 3* expression was upreg-  
87 ulated in sterile honeybee workers [Cardoen et al., 2011]. *Excitatory amino acid transporter 1*  
88 expression differences were also associated with worker - queen differentiation in the paper wasp  
89 *Polistes metricus* [Toth et al., 2014]. The MeDIP allele of *elongation of very long chain fatty*  
90 *acids protein 6-like* (AELG01004467.1) was expressed. The timing of the upregulation of fatty  
91 acid metabolism was found to be different in queen and worker honeybees [Li et al., 2010]. The  
92 MeDIP allele of *ras GTPase-activating protein nGAP-like* (AELG01004618.1) was expressed  
93 in our sample. *Ras GTPase-activating protein 1* was found to be upregulated in reproductive  
94 honeybee workers [Cardoen et al., 2011]. It is involved in oocyte meiosis.

95 We found the MeDIP allele of *bicaudal D-related protein homolog* (AELG01005399.1) to be  
96 expressed in our sample. Bicaudal is involved in embryonic pattern formation in *Drosophila*  
97 [Markesich et al., 2000]. It is thought to be involved in the differentiation between soldiers and  
98 workers in the termite *Reticulitermes flavipes* [Scharf et al., 2003]. Intriguingly, *bicaudal protein*  
99 *D* has been shown to be methylated more in eggs than sperm in honeybees [Drewell et al.,  
100 2014]. To our knowledge this is the first link between gamete specific methylation and adult  
101 monoallelic methylation found in insects. This would be a key component of any methylation

102 based imprinting system.

103 We then looked at these 19 genes in all thirty RNA-seq libraries. If they are monoallelically  
104 expressed in these bees, we would find only one allele in a given RNA-seq library. 15 of these 19  
105 genes were confirmed to show monoallelic expression in all 30 RNA-seq libraries, see supplement-  
106 tary table 2. We would also find only one allele if that bee was homozygote. We can not rule  
107 out that these fifteen genes just happen to be homozygote in all thirty bees from five different  
108 colonies from multiple sources, but this result at least suggests that the finding in the monoal-  
109 lelic analysis can be generalized. The remaining 4 genes (AELG01000620.1, AELG01001021.1,  
110 AELG01002224.1a, AELG01002224.1b) were inconsistent; they showed expression of one allele  
111 in some *B. terrestris* workers, and expression of two alleles in other workers.

112 We then searched more generally for allele specific expression in the 30 RNA-seq libraries.  
113 533 SNPs showed allele-specific expression in  $\geq 3$  of the 30 RNA-seq libraries (supplementary  
114 table 3). Blastn against *Bombus terrestris* returned 275 hits, and blastx against *Drosophila*  
115 *melanogaster* returned 301 hits. 127 of the blastx results had GO annotations.

116 Of particular interest, allele specific expression was found to be present in the *homeobox*  
117 *protein hox-a3-like* gene (AELG01000285.1). *Hoxa3* is thought to be involved in the regulation  
118 of gene expression and embryonic development, and is predicted to be maternally imprinted  
119 in humans [Luedi et al., 2007, Wang, 2014]. We also found the *paternally-expressed gene 3*  
120 (*PEG3*) (AELGO1005183.1) to show allele specific expression. In mammals *PEG3* is highly  
121 expressed in the brain, ovaries, and placenta, where it is involved in the transcriptional control  
122 of foetal growth [Hiby et al., 2001, Kim et al., 1997, 2013b, Kohda et al., 2001]. *PEG3* shows  
123 allele-specific expression in several organs in humans, including the foetal brain [Murphy et al.,  
124 2001]. Furthermore, *PEG3* has previously been demonstrated to be maternally imprinted in  
125 humans and mice [Kaneko-Ishino et al., 1995, Kuroiwa et al., 1996].

126 One hundred and seventy Gene ontology(GO) terms were enriched in the 533 regions showing  
127 allele specific expression (Fishers exact test). Figure 2 shows the large number of biological  
128 functions associated with these 533 genes. It would be expected that most of these genes are

129 not involved in epigenetic processes. Allele specific expression is known to be caused by a  
130 number of genetic as well as epigenetic processes [Palacios et al., 2009]. The genetic processes  
131 usually involve transcription factor binding sites, or less often, involve untranslated regions which  
132 alter RNA stability or microRNA binding [Farh et al., 2005]. Several potential epigenetically  
133 controlled pathways were also present. The ecdysone receptor-mediated signalling pathway was  
134 enriched, as were processes involved in gene transcription (e.g. negative regulation of DNA  
135 recombination) (Figure 2).

## Conclusions

136 Our results found that genes that are both monallelically methylated and monoallelically ex-  
137 pressed are enriched for functions to do with social organisation in social insects. For example  
138 several genes showed roles in ecdysone pathways. In various social insect species ecdysteroids  
139 have been shown to be involved in ovary activation and dominance hierarchy in workers and  
140 queens [Geva et al., 2005]. Theory has predicted that imprinting should be associated with these  
141 types of functions [Queller, 2003]. Of particular note is *bicaudal protein D*, the first evidence in  
142 insects of a possible link between gamete specific methylation and adult monoallelic methylation.  
143 This link would be a key component of any putative methylation based imprinting system.

## Materials and Methods

### Samples

144 Data from thirty RNA-seq libraries were used for the allele specific expression analysis (twenty  
145 three from Riddell et al. [2014], six from Harrison et al. [2015] and a RNA-seq library from  
146 the bee also used for methylation analysis). The Riddell bees came from two colonies, one  
147 commercially reared bumblebee colony from Koppert Biological Systems U.K. and one colony  
148 from a wild caught queen from the botanic gardens, Leicester. The Harrison bees were from three  
149 commercially reared colonies obtained from Agralan Ltd. The bees used for the MeDIP-seq /  
150 MRE-seq / RNA-seq experiment and for the qPCR analysis were from separate Koppert colonies.  
151 Samples are outlined in Table 1. Colonies were fed *ad libitum* with pollen (Percie du sert,  
152 France) and 50 % diluted glucose/fructose mix (Meliose Roquette, France). Before and during  
153 the experiments colonies were kept at 26°C and 60 % humidity in constant red light.

### Next generation sequencing

#### MeDIP-seq, MRE-seq and RNA-seq

154 RNA and DNA was extracted from a single five day old whole bee (Colony K1). DNA was  
155 extracted using an ethanol precipitation method. Total RNA was extracted using Tri-reagent  
156 (Sigma-Aldrich, UK).

157 Three libraries were prepared from this bee by Eurofins genomics. These were MeDIP-seq  
158 and MRE-seq libraries on the DNA sample and one amplified short insert cDNA library with  
159 size of 150-400 bp using RNA. Both the MeDIP-seq and MRE-seq library preparations are  
160 based on previously published protocols [Harris et al., 2010]. MeDIP-seq uses monoclonal anti-  
161 bodies against 5-methylcytosine to enrich for methylated DNA independent of DNA sequence.  
162 MRE-seq enriches for unmethylated cytosines by using methylation-sensitive enzymes that cut  
163 only restriction sites with unmethylated CpGs. Each library was individually indexed. Sequenc-  
164 ing was performed on an Illumina HiSeq2000 instrument (Illumina, Inc.) by the manufacturers

165 protocol. Multiplexed 100 base paired-read runs were carried out yielding 9390 Mbp for the  
166 MeDIP-seq library, 11597 Mbp for the MRE-seq library and 8638 Mbp for the RNA-seq library.

### **Previously published RNA-seq**

167 Full details of the RNA-seq protocols used have been published previously [Harrison et al., 2015,  
168 Riddell et al., 2014]. Briefly, for the Riddell bees, total RNA was extracted from twenty three  
169 individual homogenised abdomens using Tri-reagent (Sigma-Aldrich, UK). TruSeq RNA-seq  
170 libraries were made from the 23 samples at NBAF Edinburgh. Multiplexed 50 base single-read  
171 runs was performed on an Illumina HiSeq2000 instrument (Illumina, Inc.) by the manufacturers  
172 protocol. For the Harrison bees, total RNA was extracted from whole bodies using a GenElute  
173 Mammalian Total RNA Miniprep kit (Sigma-Aldrich) following the manufacturers' protocol.  
174 The six libraries were sequenced as multiplexed 50 base single-read runs on an Illumina HiSeq  
175 2500 system in rapid mode at the Edinburgh Genomics facility of the University of Edinburgh.

### **Monoallelic methylation and expression - Bioinformatic analysis**

176 We searched for genes that were monoallelically methylated (present in both methylation li-  
177 braries), heterozygous and monoallelically expressed (only one allele present in the RNA-seq  
178 library).

### **Alignment and bam refinement**

179 mRNA reads were aligned to the *Bombus terrestris* genome assembly (AELG00000000) us-  
180 ing Tophat [Kim et al., 2013a] and converted to bam files with Samtools [Li et al., 2009].  
181 Reads were labelled with the AddOrReplaceReadGroups.jar utility in Picard (<http://picard.sourceforge.net/>). The MRE-seq and MeDIP-seq reads were aligned to the genome using  
182 BWA mapper [Li and Durbin, 2009]. The resultant sam alignments were soft-clipped with the  
183 CleanSam.jar utility in Picard and converted to bam format with Samtools. The Picard utility  
184 AddOrReplaceReadGroups.jar was used to label the MRE and MeDIP reads which were then  
185



186 locally re-aligned with GATK [DePristo et al., 2011, McKenna et al., 2010]. PCR duplicates for  
187 all bams (mRNA, MeDIP and MRE) were marked with the Picard utility Markduplicates.jar.

### Identifying regions of interest and integrating data

188 Coverage of each data type was calculated using GATK DepthofCoverage [McKenna et al., 2010].  
189 Only regions with a read depth of at least six in each of the libraries (RNA-seq, MeDIP-seq and  
190 MRE-seq) was used. Heterozygotes were identified using Samtools mpileup and bcftools on each  
191 data set separately [Li and Durbin, 2009] and results were merged with vcf tools [Danecek et al.,  
192 2011]. CpG islands were identified using CpG island searcher [Takai and Jones, 2002]. Regions  
193 of mRNA with overlaps of MeDIP, MRE, CpG islands and monoallelic snps were identified with  
194 custom perl scripts.

### Allele specific expression - Bioinformatic analysis

195 We created a pipeline to search for heterozygous loci that show allele-specific expression and iden-  
196 tify the associated enriched gene ontology (GO) terms in thirty previously published RNA-seq  
197 libraries [Harrison et al., 2015, Riddell et al., 2014]. Each RNA library was mapped to the *Bom-*  
198 *bus terrestris* reference genome (AELG00000000) [Sadd et al., 2015] using the BWA mapper [Li  
199 and Durbin, 2009].

200 Bcftools (version 0.1.19-44428cd), bedtools (v2.17.0), and samtools (version 0.1.19-44428cd)  
201 were used to prepare the RNA libraries and call the SNPs, before the SNPs were filtered based  
202 on mapping quality score [Li and Durbin, 2009, Quinlan and Hall, 2010]. Only SNPs with a  
203 mapping quality score of  $p < 0.05$  and a read depth of  $\geq 6$  were included in the analyses. The  
204 R package, QuASAR, was then used to identify genotypes (according to the Hardy-Weinberg  
205 equilibrium), and locate any allele specific expression at heterozygous sites [Harvey et al., 2014].  
206 The loci (the snp position +/- 2900bp) identified as showing ASE in at least three of the thirty  
207 libraries, were blasted (Blastx) against *Drosophila melanogaster* proteins (non-redundant (nr)  
208 database) [Altschul et al., 1997]. The blast results were annotated using Blast2Go [Gotz et al.,

209 2008]. Fisher's exact test was implemented to identify enriched GO terms, which were then  
210 visualised using REVIGO [Supek et al., 2011]. To identify which bumblebee genes the snps  
211 were located in, the snp position +/- 25 bp was blasted (Blastn) against the *Bombus terrestris*  
212 genome [Sadd et al., 2015].

### Candidate gene allele specific qPCR

213 DNA was extracted from four bees from three Koppert colonies using the Qiagen DNA Micro kit  
214 according to manufacturer's instructions. RNA was extracted from a sample of the head with  
215 the QIAGEN RNeasy Mini Kit according to manufacturer's instructions. cDNA was synthesized  
216 from a 8µl sample of RNA using the Tetro cDNA synthesis Kit (Bioline) as per manufacturer's  
217 instructions.

218 We amplified numerous fragments of the 19 candidate genes. Sanger sequencing results  
219 were analyzed using the heterozygote analysis module in Geneious version 7.3.0 to identify  
220 heterozygotic nucleotide positions. It was difficult to identify snps in exonic regions of the 19  
221 loci, which could be amplified with primers of suitable efficiency. We managed to identify a  
222 suitable region in *slit homolog 2 protein-like* (AELG01000623.1 exonic region 1838-2420).

223 The locus was run for 3 different reactions; T allele, G allele and reference. Reference primers  
224 were designed according to Gineikiene et al. [2009]. A common reverse primer (CTGGTTC-  
225 CGTCCAATCTAA) was used for all three reactions. A reference forward primer (CGTGTCCA-  
226 GAATCGACAATG) was designed to the same target heterozygote sequence, upstream of the  
227 heterozygote nucleotide position. The reference primers measure the total expression of the  
228 gene, whereas the allele specific primers (T allele: CCAGAATCGACAATGACTCGT, G allele:  
229 CAGAATCGACAATGACTCGG) measure the amount of expression due to the allele. Thus the  
230 ratio between the allele specific expression and reference locus expression would be the relative  
231 expression due to the allele.

232 Three replicate samples were run for each reaction. All reactions were prepared by the  
233 Corbett robotics machine, in 96 well qPCR plates (Thermo Scientific, UK). The qPCR reaction

234 mix (20 $\mu$ l) was composed of 1 $\mu$ l of diluted cDNA (50ng/ $\mu$ l), 1 $\mu$ l of forward and reverse primer  
235 (5 $\mu$ M/ $\mu$ l each), 10 $\mu$ l 2X SYBR Green JumpStart Taq ReadyMix (Sigma Aldrich, UK) and 7 $\mu$ l  
236 ddH<sub>2</sub>O. Samples were run in a PTC-200 MJ thermocycler. The qPCR profile was; 4 minutes  
237 at 95°C denaturation followed by 40 cycles of 30s at 95°C, 30s at 59°C and 30s at 72°C and a  
238 final extension of 5 minutes at 72°C.

239 Forward primers are different, both in their terminal base (to match the snp) and in their  
240 length. It is entirely possible that they may amplify more or less efficiently even if there was  
241 no difference in amount of template [Pfaffl, 2001]. To test for this we repeated all qPCRs with  
242 genomic DNA (1 $\mu$ l of diluted DNA (20ng/ $\mu$ l) from the same bees as the template. We would  
243 expect equal amounts of each allele in the genomic DNA. We also measured efficiency of each  
244 reaction as per Liu and Saint [2002].

245 Median  $C_t$  was calculated for each set of three technical replicates. A measure of relative  
246 expression (ratio) was calculated for each allele in each worker bee as follows:

$$ratio_{allele} = \frac{E_{allele}^{-C_t^{allele}}}{E_{reference}^{-C_t^{reference}}} \quad (1)$$

247 E is the median efficiency of each primer set [Liu and Saint, 2002, Pfaffl, 2001]. All statistical  
248 analysis was carried out using R (3.1.0) [Team, 2015].

## Acknowledgements

249 This work was financially supported by NERC grant no. NE/H010408/1 and NERC Biomolecu-  
250 lar Analysis Facility research grants (NBAF 606 and 829) to EBM. Illumina library preparation,  
251 sequencing and bioinformatics were carried out by Edinburgh Genomics, The University of Edin-  
252 burgh. Edinburgh Genomics is partly supported through core grants from NERC (R8/H10/56),  
253 MRC (MR/K001744/1) and BBSRC (BB/J004243/1). ZNL would like to thank UK BBSRC  
254 for its financial support via MIBTP. The funders had no role in study design, data collection  
255 and analysis, decision to publish, or preparation of the manuscript.

## Data accessibility

256 All sequence data for this study are archived at European Nucleotide Archive (ENA); Accession  
257 no. PRJEB9366 (<http://www.ebi.ac.uk/ena/data/view/PRJEB9366>). GO-analysis results and  
258 lists of differentially expressed transcripts are available as Supporting Information.

## Author contributions

259 EBM designed the project. HEA and DN carried out the experiments. EBM, KDL, MK and  
260 ZNL analysed the data. ZNL and EBM wrote the initial draft. All authors were involved in the  
261 redrafting of the manuscript.

## References

- 262 S. F. Altschul, T. L. Madden, A. A. Schaffer, J. H. Zhang, Z. Zhang, W. Miller, and D. J.  
263 Lipman. Gapped BLAST and PSI-BLAST: a new generation of protein database search  
264 programs. *Nucleic Acids Research*, 25:3389--3402, September 1997. ISSN 0305-1048. URL  
265 ://A1997XU79300002. 17.
- 266 Harindra Amarasinghe, B.J. Toghill, D Nathanael, and E. B Mallon. Allele specific expression  
267 in worker reproduction genes in the bumblebee *Bombus terrestris*. *PeerJ*, 3:e1079, 2015. doi:  
268 <https://dx.doi.org/10.7717/peerj.1079>. URL <https://peerj.com/articles/1079/>.
- 269 Harindra E. Amarasinghe, Crisenthya I. Clayton, and Eamonn B. Mallon. Methylation and  
270 worker reproduction in the bumble-bee (*Bombus terrestris*). *Proceedings of the Royal Society*  
271 *B: Biological Sciences*, 281(1780):20132502, April 2014. ISSN 0962-8452, 1471-2954. doi:  
272 [10.1098/rspb.2013.2502](https://doi.org/10.1098/rspb.2013.2502). URL [http://rspb.royalsocietypublishing.org/content/281/](http://rspb.royalsocietypublishing.org/content/281/1780/20132502)  
273 [1780/20132502](http://rspb.royalsocietypublishing.org/content/281/1780/20132502).
- 274 Roberto Bonasio, Qiye Li, Jinmin Lian, Navdeep S. Mutti, Lijun Jin, Hongmei Zhao, Pei  
275 Zhang, Ping Wen, Hui Xiang, Yun Ding, Zonghui Jin, Steven S. Shen, Zongji Wang, Wen

- 276 Wang, Jun Wang, Shelley L. Berger, Jrgen Liebig, Guojie Zhang, and Danny Reinberg.  
277 Genome-wide and Caste-Specific DNA Methylomes of the Ants *Camponotus floridanus* and  
278 *Harpegnathos saltator*. *Current Biology*, 22(19):1755--1764, October 2012. ISSN 0960-9822.  
279 doi: 10.1016/j.cub.2012.07.042. URL [http://www.cell.com/current-biology/abstract/  
280 S0960-9822\(12\)00867-6](http://www.cell.com/current-biology/abstract/S0960-9822(12)00867-6).
- 281 Dries Cardoen, Tom Wenseleers, Ulrich R. Ernst, Ellen L. Danneels, Dries Laget, Dirk C.  
282 DE Graaf, Liliane Schoofs, and Peter Verleyen. Genome-wide analysis of alternative repro-  
283 ductive phenotypes in honeybee workers. *Molecular Ecology*, 20(19):4070--4084, October 2011.  
284 ISSN 1365-294X. doi: 10.1111/j.1365-294X.2011.05254.x.
- 285 A. Chittka, Y. Wurm, and L. Chittka. Epigenetics: The making of ant castes. *Current Biology*,  
286 22(19):R835--R838, 2012. ISSN 0960-9822. doi: 10.1016/j.cub.2012.07.045.
- 287 Petr Danecek, Adam Auton, Goncalo Abecasis, Cornelis A. Albers, Eric Banks, Mark A. De-  
288 Prito, Robert E. Handsaker, Gerton Lunter, Gabor T. Marth, Stephen T. Sherry, Gilean  
289 McVean, and Richard Durbin. The variant call format and VCFtools. *Bioinformatics*, 27(15):  
290 2156--2158, August 2011. ISSN 1367-4803, 1460-2059. doi: 10.1093/bioinformatics/btr330.  
291 URL <http://bioinformatics.oxfordjournals.org/content/27/15/2156>.
- 292 Mark A. DePrito, Eric Banks, Ryan Poplin, Kiran V. Garimella, Jared R. Maguire, Christo-  
293 pher Hartl, Anthony A. Philippakis, Guillermo del Angel, Manuel A. Rivas, Matt Hanna,  
294 Aaron McKenna, Tim J. Fennell, Andrew M. Kernytzky, Andrey Y. Sivachenko, Kristian  
295 Cibulskis, Stacey B. Gabriel, David Altshuler, and Mark J. Daly. A framework for vari-  
296 ation discovery and genotyping using next-generation DNA sequencing data. *Nature Ge-  
297 netics*, 43(5):491--498, May 2011. ISSN 1061-4036. doi: 10.1038/ng.806. URL [http:  
298 //www.nature.com/ng/journal/v43/n5/full/ng.806.html](http://www.nature.com/ng/journal/v43/n5/full/ng.806.html).
- 299 Robert A. Drewell, Eliot C. Bush, Emily J. Remnant, Garrett T. Wong, Suzannah M. Beeler,  
300 Jessica L. Stringham, Julianne Lim, and Benjamin P. Oldroyd. The dynamic DNA methy-  
301 lation cycle from egg to sperm in the honey bee *Apis mellifera*. *Development*, 141(13):

302 2702--2711, July 2014. ISSN 0950-1991, 1477-9129. doi: 10.1242/dev.110163. URL <http://dev.biologists.org/content/141/13/2702>.

304 Kyle Kai-How Farh, Andrew Grimson, Calvin Jan, Benjamin P. Lewis, Wendy K. Johnston,  
305 Lee P. Lim, Christopher B. Burge, and David P. Bartel. The widespread impact of mam-  
306 malian MicroRNAs on mRNA repression and evolution. *Science (New York, N.Y.)*, 310  
307 (5755):1817--1821, December 2005. ISSN 1095-9203. doi: 10.1126/science.1121158.

308 Sharon Geva, Klaus Hartfelder, and Guy Bloch. Reproductive division of labor, dominance, and  
309 ecdysteroid levels in hemolymph and ovary of the bumble bee *Bombus terrestris*. *Journal of*  
310 *Insect Physiology*, 51(7):811--823, July 2005. ISSN 0022-1910. doi: 10.1016/j.jinsphys.2005.  
311 03.009.

312 Egle Gineikiene, Mindaugas Stoskus, and Laimonas Griskevicius. Single Nucleotide  
313 Polymorphism-Based System Improves the Applicability of Quantitative PCR for Chimerism  
314 Monitoring. *The Journal of Molecular Diagnostics : JMD*, 11(1):66--74, January 2009. ISSN  
315 1525-1578. doi: 10.2353/jmoldx.2009.080039. URL [http://www.ncbi.nlm.nih.gov/pmc/  
316 articles/PMC2607568/](http://www.ncbi.nlm.nih.gov/pmc/articles/PMC2607568/).

317 K. M. Glastad, B. G. Hunt, S. V. Yi, and M. a. D. Goodisman. DNA methylation in insects:  
318 on the brink of the epigenomic era. *Insect Molecular Biology*, 20(5):553--565, 2011. ISSN  
319 1365-2583. doi: 10.1111/j.1365-2583.2011.01092.x. URL [http://onlinelibrary.wiley.com/  
320 doi/10.1111/j.1365-2583.2011.01092.x/abstract](http://onlinelibrary.wiley.com/doi/10.1111/j.1365-2583.2011.01092.x/abstract).

321 Stefan Gotz, Juan Miguel Garca-Gmez, Javier Terol, Tim D. Williams, Shivashankar H. Nagaraj,  
322 Mara Jos Nueda, Montserrat Robles, Manuel Taln, Joaquin Dopazo, and Ana Conesa. High-  
323 -throughput functional annotation and data mining with the Blast2go suite. *Nucleic Acids*  
324 *Research*, 36(10):3420--3435, June 2008. ISSN 0305-1048, 1362-4962. doi: 10.1093/nar/gkn176.  
325 URL <http://nar.oxfordjournals.org/content/36/10/3420>.

326 D. Haig. The kinship theory of genomic imprinting. *Annual Review of Ecology and Systematics*,

327 31:9--32, 2000.

328 R Alan Harris, Ting Wang, Cristian Coarfa, Raman P Nagarajan, Chibo Hong, Sara L  
329 Downey, Brett E Johnson, Shaun D Fouse, Allen Delaney, Yongjun Zhao, Adam Olshen,  
330 Tracy Ballinger, Xin Zhou, Kevin J Forsberg, Junchen Gu, Lorigail Echipare, Henriette  
331 O'Geen, Ryan Lister, Mattia Pelizzola, Yuanxin Xi, Charles B Epstein, Bradley E Bernstein,  
332 R David Hawkins, Bing Ren, Wen-Yu Chung, Hongcang Gu, Christoph Bock, Andreas Gnirke,  
333 Michael Q Zhang, David Haussler, Joseph R Ecker, Wei Li, Peggy J Farnham, Robert A Wa-  
334 terland, Alexander Meissner, Marco A Marra, Martin Hirst, Aleksandar Milosavljevic, and  
335 Joseph F Costello. Comparison of sequencing-based methods to profile DNA methylation and  
336 identification of monoallelic epigenetic modifications. *Nature biotechnology*, 28(10):1097--1105,  
337 October 2010. ISSN 1546-1696. doi: 10.1038/nbt.1682.

338 M C Harrison, R L Hammond, and E B Mallon. Reproductive workers show queen-like gene  
339 expression in an intermediately eusocial insect, the buff-tailed bumble bee *Bombus terrestris*.  
340 *Molecular Ecology*, 24:121--129, April 2015. ISSN 1365-294X. doi: 10.1111/mec.13215. URL  
341 <http://onlinelibrary.wiley.com/doi/10.1111/mec.13215/abstract>.

342 Chris T. Harvey, Gregory A. Moyerbrailean, Gordon O. Davis, Xiaoquan Wen, Francesca Luca,  
343 and Roger Pique-Regi. QuASAR: Quantitative Allele Specific Analysis of Reads. *Bioinformat-*  
344 *ics*, page btu802, December 2014. ISSN 1367-4803, 1460-2059. doi: 10.1093/bioinformatics/  
345 btu802. URL [http://bioinformatics.oxfordjournals.org/content/early/2014/12/04/](http://bioinformatics.oxfordjournals.org/content/early/2014/12/04/bioinformatics.btu802)  
346 [bioinformatics.btu802](http://bioinformatics.oxfordjournals.org/content/early/2014/12/04/bioinformatics.btu802).

347 Susan E. Hiby, Maria Lough, E. Barry Keverne, M. Azim Surani, Yung Wai Loke, and Ashley  
348 King. Paternal monoallelic expression of PEG3 in the human placenta. *Human Molecular*  
349 *Genetics*, 10(10):1093--1100, 2001.

350 Tomoko Kaneko-Ishino, Yoshimi Kuroiwa, Naoki Miyoshi, Takashi Kohda, Rika Suzuki, Mine-  
351 suke Yokoyama, Stephane Viville, Sheila C. Barton, Fumitoshi Ishino, and M. Azim Surani.

352 Peg1/Mest imprinted gene on chromosome 6 identified by cDNA subtraction hybridization.  
353 *Nature genetics*, 11:52--59, 1995.

354 Kevin Kelley, Kelly R. Miller, Amber Todd, Amy Kelley, Rebecca Tuttle, and Steven J.  
355 Berberich. YPEL3, a p53-regulated gene that induces cellular senescence. *Cancer research*,  
356 70(9):3566--3575, May 2010. ISSN 0008-5472. doi: 10.1158/0008-5472.CAN-09-3219. URL  
357 <http://www.ncbi.nlm.nih.gov/pmc/articles/PMC2862112/>.

358 Daehwan Kim, Geo Pertea, Cole Trapnell, Harold Pimentel, Ryan Kelley, and Steven L.  
359 Salzberg. TopHat2: accurate alignment of transcriptomes in the presence of insertions, dele-  
360 tions and gene fusions. *Genome Biology*, 14(4):R36, April 2013a. ISSN 1465-6906. doi:  
361 10.1186/gb-2013-14-4-r36. URL <http://genomebiology.com/2013/14/4/R36/abstract>.

362 Joomyeong Kim, Linda Ashworth, Elbert Branscomb, and Lisa Stubbs. The Human Homolog  
363 of a Mouse-Imprinted Gene, Peg3, Maps to a Zinc Finger Gene-Rich Region of Human Chro-  
364 mosome 19q13.4. *Genome Research*, 7:532--540, 1997.

365 Joomyeong Kim, Wesley D. Frey, Hongzhi He, Hana Kim, Muhammed Ekram, Arundhati Bak-  
366 shi, Mohammed Faisal, Bambarendage P. U. Perera, An Ye, and Ryoichi Teruyama. Peg3  
367 Mutational Effects on Reproduction and Placenta- Specific Gene Families. *PLOS ONE*, 8(12),  
368 2013b.

369 Sarah D. Kocher, Jennifer M. Tsuruda, Joshua D. Gibson, Christine M. Emore, Miguel E.  
370 Arechavaleta-Velasco, David C. Queller, Joan E. Strassmann, Christina M. Grozinger,  
371 Michael R. Gribskov, Phillip San Miguel, Rick Westerman, and Greg J. Hunt. A Search  
372 for Parent-of-Origin Effects on Honey Bee Gene Expression. *G3 (Bethesda, Md.)*, June 2015.  
373 ISSN 2160-1836. doi: 10.1534/g3.115.017814.

374 Takashi Kohda, Akio Asai, Yoshimi Kuroiwa, Shin Kobayashi, Kohzoh Aisaka, Goro Na-  
375 gashima, Michihiro C. Yoshida, Yasumitsu Kondo, Naoto Kagiya, Takaaki Kirino, Tomoko  
376 Kaneko-Ishino, and Fumitoshi Ishino. Tumour suppressor activity of human imprinted gene



- 377 iqQ in a glioma cell line. *Genes to Cells*, 6:237--247, 2001.
- 378 Yoshimi Kuroiwa, Tomoko Kaneko-Ishino, Fusako Kagitani, Takashi Kohda, Li-Lan Li, Masako  
379 Tada, Rika Suzuki, Minesuke Yokoyama, Toshihiko Shiroishi, Sigeharu Wakana, Sheila C.  
380 Barton, Fumitoshi Ishino, and M. Azim Surani. Peg3 imprinted gene on proximal chromosome  
381 7 encodes for a zinc finger protein. *Nature genetics*, 12:186--190, 1996.
- 382 M. Leszczyniecka, U. Bhatia, M. Cueto, N. R. Nirmala, H. Towbin, A. Vattay, B. Wang,  
383 S. Zabrudoff, and P. E. Phillips. MAP1d, a novel methionine aminopeptidase family member  
384 is overexpressed in colon cancer. *Oncogene*, 25(24):3471--3478, June 2006. ISSN 0950-9232.  
385 doi: 10.1038/sj.onc.1209383.
- 386 Heng Li and Richard Durbin. Fast and accurate short read alignment with Burrows-Wheeler  
387 transform. *Bioinformatics (Oxford, England)*, 25(14):1754--1760, July 2009. ISSN 1367-4811.  
388 doi: 10.1093/bioinformatics/btp324.
- 389 Heng Li, Bob Handsaker, Alec Wysoker, Tim Fennell, Jue Ruan, Nils Homer, Gabor Marth,  
390 Goncalo Abecasis, Richard Durbin, and 1000 Genome Project Data Processing Subgroup.  
391 The Sequence Alignment/Map format and SAMtools. *Bioinformatics (Oxford, England)*, 25  
392 (16):2078--2079, August 2009. ISSN 1367-4811. doi: 10.1093/bioinformatics/btp352.
- 393 Jianke Li, Jing Wu, Desalegn Begna Rundassa, Feifei Song, Aijuan Zheng, and Yu Fang. Dif-  
394 ferential Protein Expression in Honeybee (*Apis mellifera* L.) Larvae: Underlying Caste Differ-  
395 entiation. *PLoS ONE*, 5(10):e13455, October 2010. doi: 10.1371/journal.pone.0013455. URL  
396 <http://dx.doi.org/10.1371/journal.pone.0013455>.
- 397 Weihong Liu and David A. Saint. A New Quantitative Method of Real Time Reverse Tran-  
398 scription Polymerase Chain Reaction Assay Based on Simulation of Polymerase Chain Re-  
399 action Kinetics. *Analytical Biochemistry*, 302(1):52--59, March 2002. ISSN 0003-2697.  
400 doi: 10.1006/abio.2001.5530. URL [http://www.sciencedirect.com/science/article/  
401 pii/S0003269701955307](http://www.sciencedirect.com/science/article/pii/S0003269701955307).

402 Philippe P. Luedi, Fred S. Dietrich, Jennifer R. Weidman, Jason M. Bosko, Randy L. Jirtle,  
403 and Alexander J. Hartemink. Computational and experimental identification of novel human  
404 imprinted genes. *Genome Research*, 17:1723--1730, 2007.

405 Roberta Magnani, Lynnette M. A. Dirk, Raymond C. Trievel, and Robert L. Houtz. Calmod-  
406 ulin methyltransferase is an evolutionarily conserved enzyme that trimethylates Lys-115 in  
407 calmodulin. *Nature Communications*, 1:43, July 2010. doi: 10.1038/ncomms1044. URL  
408 <http://www.nature.com/ncomms/journal/v1/n4/full/ncomms1044.html>.

409 D. C. Markesich, K. M. Gajewski, M. E. Nazimiec, and K. Beckingham. bicaudal encodes  
410 the Drosophila beta NAC homolog, a component of the ribosomal translational machinery\*.  
411 *Development (Cambridge, England)*, 127(3):559--572, February 2000. ISSN 0950-1991.

412 Aaron McKenna, Matthew Hanna, Eric Banks, Andrey Sivachenko, Kristian Cibulskis, Andrew  
413 Kernytsky, Kiran Garimella, David Altshuler, Stacey Gabriel, Mark Daly, and Mark A. De-  
414 Pristo. The Genome Analysis Toolkit: A MapReduce framework for analyzing next-generation  
415 DNA sequencing data. *Genome Research*, 20(9):1297--1303, September 2010. ISSN 1088-9051,  
416 1549-5469. doi: 10.1101/gr.107524.110. URL [http://genome.cshlp.org/content/20/9/](http://genome.cshlp.org/content/20/9/1297)  
417 [1297](http://genome.cshlp.org/content/20/9/1297).

418 Susan K. Murphy, Andrew A. Wylie, and Randy L. Jirtle. Imprinting of PEG3, the Human  
419 Homologue of a Mouse Gene Involved in Nurturing Behavior. *Genomics*, 71:110--117, 2001.

420 Ricardo Palacios, Elodie Gazave, Joaquin Goi, Gabriel Piedrafita, Olga Fernando, Arcadi  
421 Navarro, and Pablo Villoslada. Allele-Specific Gene Expression Is Widespread Across the  
422 Genome and Biological Processes. *PLoS ONE*, 4(1):e4150, January 2009. doi: 10.1371/  
423 [journal.pone.0004150](http://dx.doi.org/10.1371/journal.pone.0004150). URL <http://dx.doi.org/10.1371/journal.pone.0004150>.

424 Michael W. Pfaffl. A new mathematical model for relative quantification in real-time RTPCR.  
425 *Nucleic Acids Research*, 29(9):e45--e45, May 2001. ISSN 0305-1048, 1362-4962. doi: 10.1093/  
426 [nar/29.9.e45](http://nar.oxfordjournals.org/content/29/9/e45). URL <http://nar.oxfordjournals.org/content/29/9/e45>.

- 427 D. C. Queller. Theory of genomic imprinting conflict in social insects. *Bmc Evolutionary Biology*,  
428 3:art. no.--15, 2003. URL ://000188122100015.
- 429 Aaron R. Quinlan and Ira M. Hall. BEDTools: a flexible suite of utilities for comparing genomic  
430 features. *Bioinformatics (Oxford, England)*, 26(6):841--842, March 2010. ISSN 1367-4811. doi:  
431 10.1093/bioinformatics/btq033.
- 432 W. Reik and J. Walter. Genomic imprinting: Parental influence on the genome. *Nature Reviews*  
433 *Genetics*, 2:21--32, January 2001. ISSN 1471-0056. URL ://000166056000014. 1.
- 434 Carolyn E. Riddell, Juan D. Lobaton Garces, Sally Adams, Seth M. Barribeau, David Twell,  
435 and Eamonn B. Mallon. Differential gene expression and alternative splicing in insect immune  
436 specificity. *BMC Genomics*, 15(1):1031, November 2014. ISSN 1471-2164. doi: 10.1186/  
437 1471-2164-15-1031. URL <http://www.biomedcentral.com/1471-2164/15/1031/comments>.
- 438 J. M. Rothberg, J. R. Jacobs, C. S. Goodman, and S. Artavanis-Tsakonas. slit: an extracellular  
439 protein necessary for development of midline glia and commissural axon pathways contains  
440 both EGF and LRR domains. *Genes & Development*, 4(12a):2169--2187, December 1990.  
441 ISSN 0890-9369, 1549-5477. doi: 10.1101/gad.4.12a.2169. URL <http://genesdev.cshlp.org/content/4/12a/2169>.
- 442
- 443 Ben M. Sadd, Seth M. Barribeau, Guy Bloch, Dirk C. de Graaf, Peter Dearden, Christine G.  
444 Elsik, Jrgen Gadau, Cornelis JP Grimmelikhuijzen, Martin Hasselmann, Jeffrey D. Lozier,  
445 Hugh M. Robertson, Guy Smagghe, Eckart Stolle, Matthias Van Vaerenbergh, Robert M.  
446 Waterhouse, Erich Bornberg-Bauer, Steffen Klasberg, Anna K. Bennett, Francisco Cmara,  
447 Roderic Guig, Katharina Hoff, Marco Mariotti, Monica Munoz-Torres, Terence Murphy, Di-  
448 dac Santesmasses, Gro V. Amdam, Matthew Beckers, Martin Beye, Matthias Biewer, Mr-  
449 cia MG Bitondi, Mark L. Blaxter, Andrew FG Bourke, Mark JF Brown, Severine D. Buechel,  
450 Rossanah Cameron, Kaat Cappelle, James C. Carolan, Olivier Christiaens, Kate L. Ci-  
451 borowski, David F. Clarke, Thomas J. Colgan, David H. Collins, Andrew G. Cridge, Tamas

452 Dalmay, Stephanie Dreier, Louis du Plessis, Elizabeth Duncan, Silvio Erler, Jay Evans, Tiago  
453 Falcon, Kevin Flores, Flvia CP Freitas, Taro Fuchikawa, Tanja Gempe, Klaus Hartfelder,  
454 Frank Hauser, Sophie Helbing, Fernanda C. Humann, Frano Irvine, Lars S. Jermiin, Claire E.  
455 Johnson, Reed M. Johnson, Andrew K. Jones, Tatsuhiko Kadowaki, Jonathan H. Kidner,  
456 Vasco Koch, Arian Khler, F. B. Kraus, H. Mg Lattorff, Megan Leask, Gabrielle A. Lock-  
457 ett, Eamonn B. Mallon, David S. Marco Antonio, Monika Marxer, Ivan Meeus, Robin FA  
458 Moritz, Ajay Nair, Kathrin Npflin, Inga Nissen, Jinzhi Niu, Francis MF Nunes, John G.  
459 Oakeshott, Amy Osborne, Marianne Otte, Daniel G. Pinheiro, Nina Rossi, Olav Rueppell,  
460 Carolina G. Santos, Regula Schmid-Hempel, Bjrjn D. Schmitt, Christina Schulte, Zil LP  
461 Simes, Michelle PM Soares, Luc Swevers, Eva C. Winnebeck, Florian Wolschin, Na Yu,  
462 Evgeny M. Zdobnov, Peshtewani K. Aqrawi, Kerstin P. Blankenburg, Marcus Coyle, Liezl  
463 Francisco, Alvaro G. Hernandez, Michael Holder, Matthew E. Hudson, LaRonda Jackson,  
464 Joy Jayaseelan, Vandita Joshi, Christie Kovar, Sandra L. Lee, Robert Mata, Tittu Mathew,  
465 Irene F. Newsham, Robin Ngo, Geoffrey Okwuonu, Christopher Pham, Ling-Ling Pu, Ne-  
466 had Saada, Jireh Santibanez, DeNard Simmons, Rebecca Thornton, Aarti Venkat, Kim-  
467 berly KO Walden, Yuan-Qing Wu, Griet Debyser, Bart Devreese, Claire Asher, Julie Blom-  
468 maert, Ariel D. Chipman, Lars Chittka, Bertrand Fouks, Jisheng Liu, Meaghan P. ONeill,  
469 Seirian Sumner, Daniela Puiu, Jiaxin Qu, Steven L. Salzberg, Steven E. Scherer, Donna M.  
470 Muzny, Stephen Richards, Gene E. Robinson, Richard A. Gibbs, Paul Schmid-Hempel, and  
471 Kim C. Worley. The genomes of two key bumblebee species with primitive eusocial organiza-  
472 tion. *Genome Biology*, 16(1):76, April 2015. ISSN 1465-6906. doi: 10.1186/s13059-015-0623-3.  
473 URL <http://genomebiology.com/2015/16/1/76/abstract>.

474 Michael E. Scharf, Dancia Wu-Scharf, Barry R. Pittendrigh, and Gary W. Bennett. Caste  
475 and development-associated gene expression in a lower termite. *Genome Biology*, 4(10):  
476 R62, September 2003. ISSN 1465-6906. doi: 10.1186/gb-2003-4-10-r62. URL <http://genomebiology.com/2003/4/10/R62/abstract>.

478 Fran Supek, Matko Bonjak, Nives kunca, and Tomislav muc. REVIGO Summarizes and Vi-

- 479 sualizes Long Lists of Gene Ontology Terms. *PLoS ONE*, 6(7):e21800, July 2011. doi:  
480 10.1371/journal.pone.0021800. URL <http://dx.doi.org/10.1371/journal.pone.0021800>.
- 481 Daiya Takai and Peter A. Jones. Comprehensive analysis of CpG islands in human chromosomes  
482 21 and 22. *Proceedings of the National Academy of Sciences*, 99(6):3740--3745, March 2002.  
483 ISSN 0027-8424, 1091-6490. doi: 10.1073/pnas.052410099. URL [http://www.pnas.org/  
484 content/99/6/3740](http://www.pnas.org/content/99/6/3740).
- 485 Hideaki Takeuchi, Rajib Kumar Paul, Emiko Matsuzaka, and Takeo Kubo. EcR-A expression  
486 in the brain and ovary of the honeybee (*Apis mellifera* L.). *Zoological Science*, 24(6):596--603,  
487 June 2007. ISSN 0289-0003. doi: 10.2108/zsj.24.596.
- 488 R-Core Team. R: A language and environment for statistical computing., 2015.
- 489 Amy L. Toth, John F. Tooker, Srihari Radhakrishnan, Robert Minard, Michael T. Henshaw,  
490 and Christina M. Grozinger. Shared genes related to aggression, rather than chemical com-  
491 munication, are associated with reproductive dominance in paper wasps (*Polistes metricus*).  
492 *BMC Genomics*, 15(1):75, January 2014. ISSN 1471-2164. doi: 10.1186/1471-2164-15-75.  
493 URL <http://www.biomedcentral.com/1471-2164/15/75/abstract>.
- 494 Hong-Dan Wang. DNA methylation study of fetus genome through a genome-wide analysis.  
495 *BMC Medical Genomics*, 7(18), 2014. URL [http://www.biomedcentral.com/1755-8794/7/  
496 18](http://www.biomedcentral.com/1755-8794/7/18).
- 497 Susan A Weiner and Amy L Toth. Epigenetics in social insects: a new direction for under-  
498 standing the evolution of castes. *Genetics research international*, 2012:609810, 2012. ISSN  
499 2090-3162. doi: 10.1155/2012/609810.
- 500 Mat Welch and Ryan Lister. Epigenomics and the control of fate, form and function in so-  
501 cial insects. *Current Opinion in Insect Science*, 1:31--38, July 2014. ISSN 2214-5745. doi:  
502 10.1016/j.cois.2014.04.005. URL [http://www.sciencedirect.com/science/article/pii/  
503 S2214574514000066](http://www.sciencedirect.com/science/article/pii/S2214574514000066).

504 Hua Yan, Daniel F. Simola, Roberto Bonasio, Jrgen Liebig, Shelley L. Berger, and Danny  
505 Reinberg. Eusocial insects as emerging models for behavioural epigenetics. *Nature Reviews*  
506 *Genetics*, 15(10):677--688, October 2014. ISSN 1471-0056. doi: 10.1038/nrg3787. URL [http:](http://www.nature.com/nrg/journal/v15/n10/abs/nrg3787.html)  
507 [//www.nature.com/nrg/journal/v15/n10/abs/nrg3787.html](http://www.nature.com/nrg/journal/v15/n10/abs/nrg3787.html).

508 Dan Zheng, Bin-Bin Liu, Yin-Kun Liu, Xiao-Nan Kang, Lu Sun, Kun Guo, Rui-Xia Sun, Jie  
509 Chen, and Yan Zhao. Analysis of the expression of Slit/Robo genes and the methylation status  
510 of their promoters in the hepatocellular carcinoma cell lines. *Zhonghua Gan Zang Bing Za*  
511 *Zhi = Zhonghua Ganzangbing Zazhi = Chinese Journal of Hepatology*, 17(3):198--202, March  
512 2009. ISSN 1007-3418.

## Figures

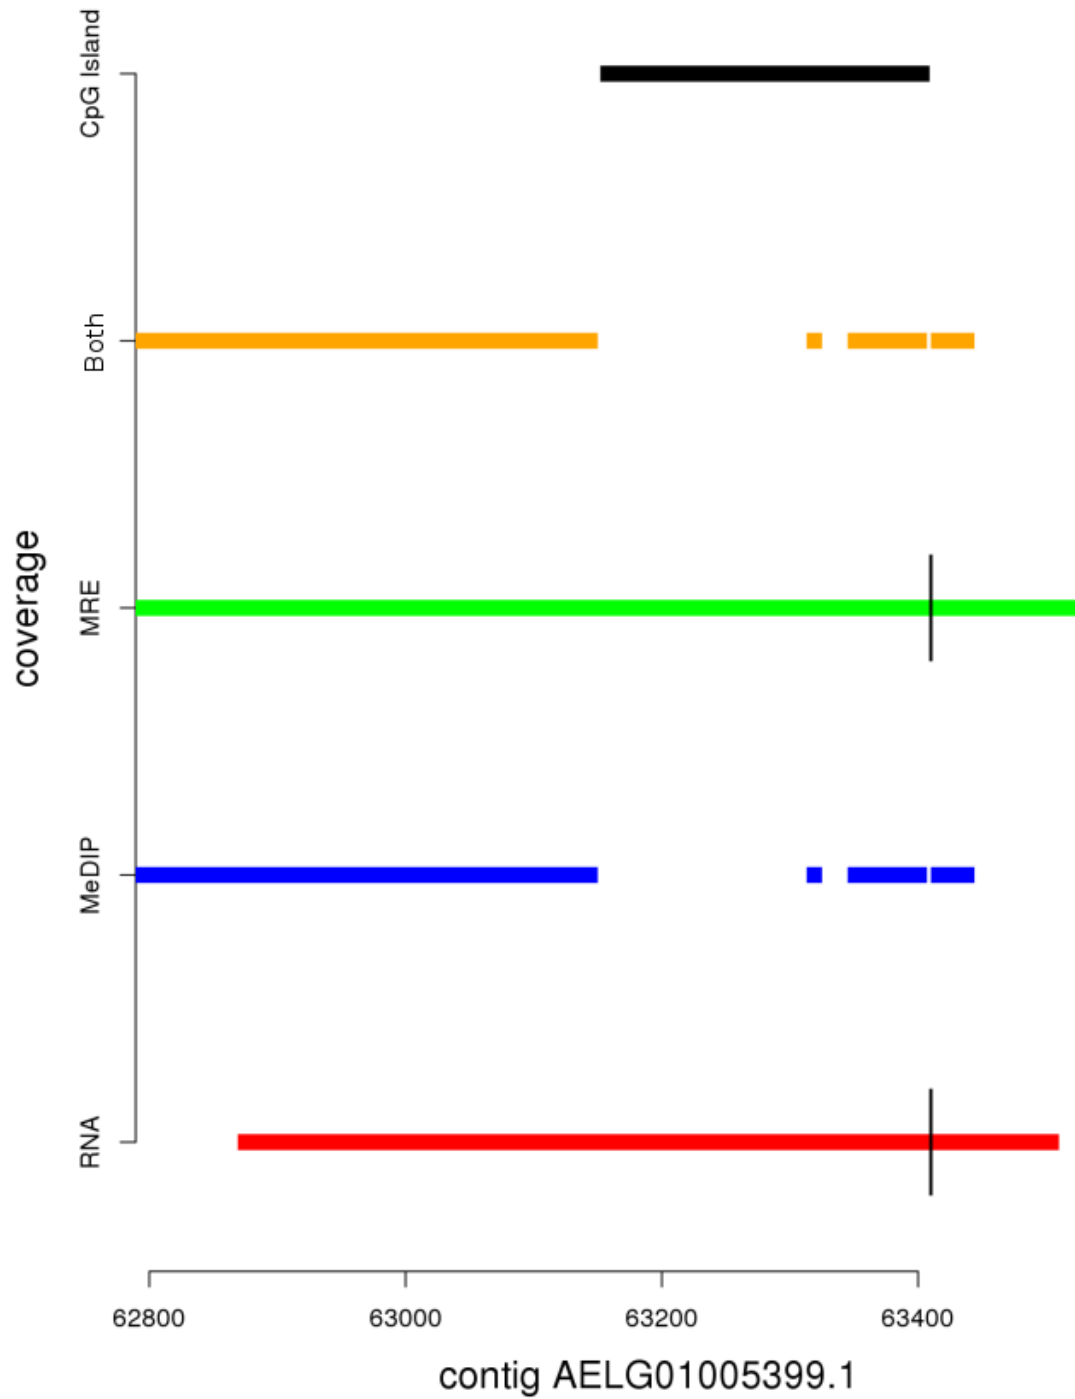

**Figure 1. Coverage of three libraries for bicaudal d.** Horizontal lines represent available reads for each library over this genomic range (x-axis). The vertical line shows the position of the snp and which genomic library shares the same allele.



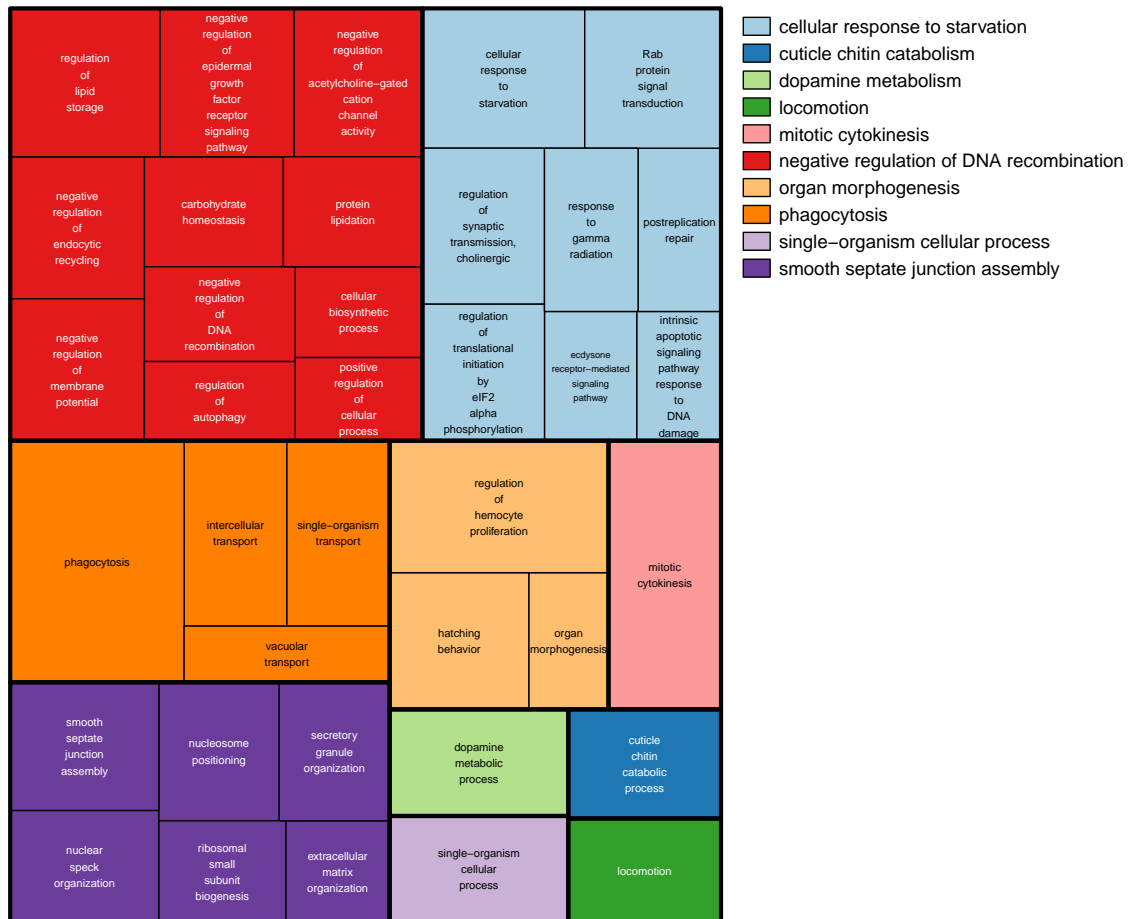

**Figure 2. GO terms associated with allele specific expression.** A summary of the enriched GO terms ( $p < 0.05$ , based on Blast2Go annotation) found for genes displaying allele specific expression. This figure was produced using Revigo

## Tables

**Table 1.** Bees used in each experiment. K refers to Koppert, A to Agralan and Q to the wild caught Leicester queen.

| Experiment                            | Number | Colony |
|---------------------------------------|--------|--------|
| Allele specific expression<br>RNA-seq | 2      | A1     |
|                                       | 2      | A2     |
|                                       | 2      | A3     |
|                                       | 1      | K1     |
|                                       | 14     | K2     |
|                                       | 9      | Q1     |
| MeDip/MRE/RNA-seq                     | 1      | K1     |
| qPCR                                  | 2      | K3     |
|                                       | 1      | K4     |
|                                       | 1      | K5     |

## Supporting Information Legends

513 **Table S1. Nineteen genes showing both monoallelic methylation and monoallelic ex-**  
514 **pression.** Blast results and genomic coordinates of the reads from the RNA-seq, MRE-seq  
515 and MeDip-seq libraries.

516 **Table S2. Confirmation of single allele expression of nineteen monoallelically ex-**  
517 **pressed genes in thirty previously published transcriptomes.** For each of the 19  
518 contigs are the previously published RNA-seq libraries with associated read counts.

519 **Table S3. 533 genes showing allele specific expression in at least three of the 30**  
520 **previously published RNA-seq libraries.** This table details the blast results from both  
521 the bumblebee and drosophila genomes and the GO terms associated with the drosophila  
522 hits.
